# Supplementary material for: Exosomal microRNAs derived from colorectal cancer-associated fibroblasts: role in driving cancer progression
Source: publisher site journal article supplement (doi:10.18632/aging.101355), 2017-12-24
Supplement: Supplementary file [file aging-v9i12-101355-supplementary-material-SD1.pdf]

**SUPPLEMENTARY MATERIAL**

**Supplementary Table 1. KEGG pathway analysis combining gene targets of miR-329-3p, miR-181a-3p, miR-199b-5p, miR-382-5p, miR-215-5p and miR-21-5p.**

| <b>KEGG Pathway</b>                 | <b><i>p</i>-value</b> | <b>Genes</b> | <b>miRNAs</b> |
|-------------------------------------|-----------------------|--------------|---------------|
| MicroRNAs in cancer                 | 9.24E-30              | 54           | 4             |
| ECM-receptor interaction            | 4.32E-21              | 19           | 4             |
| Prion diseases                      | 1.20E-16              | 7            | 2             |
| Proteoglycans in cancer             | 2.58E-09              | 52           | 4             |
| Glioma                              | 4.67E-08              | 24           | 4             |
| Colorectal cancer                   | 3.86E-06              | 23           | 4             |
| Hepatitis B                         | 9.78E-06              | 39           | 4             |
| Non-small cell lung cancer          | 1.91E-04              | 20           | 4             |
| Pathways in cancer                  | 1.91E-04              | 79           | 4             |
| Bladder cancer                      | 3.54E-04              | 18           | 4             |
| Endometrial cancer                  | 3.54E-04              | 19           | 4             |
| Pancreatic cancer                   | 4.51E-04              | 24           | 4             |
| Lysine degradation                  | 5.24E-04              | 14           | 2             |
| FoxO signaling pathway              | 1.01E-03              | 38           | 4             |
| Fatty acid elongation               | 1.04E-04              | 7            | 2             |
| PI3K-Akt signaling pathway          | 1.22E-03              | 71           | 4             |
| Focal adhesion                      | 1.31E-03              | 52           | 4             |
| Central carbon metabolism in cancer | 1.39E-03              | 20           | 4             |
| Chronic myeloid leukemia            | 1.50E-03              | 24           | 4             |
| Melanoma                            | 1.63E-03              | 22           | 4             |
| Thyroid hormone signaling pathway   | 3.61E-03              | 29           | 4             |

|                              |          |    |   |
|------------------------------|----------|----|---|
| ErbB signaling pathway       | 3.97E-03 | 23 | 4 |
| Prostate cancer              | 4.21E-03 | 27 | 4 |
| Small cell lung cancer       | 4.21E-03 | 25 | 4 |
| Thyroid cancer               | 6.83E-03 | 10 | 4 |
| HIF-1 signaling pathway      | 7.72E-03 | 29 | 3 |
| Amoebiasis                   | 1.23E-02 | 26 | 4 |
| mTOR signaling pathway       | 1.65E-02 | 19 | 4 |
| Renal cell carcinoma         | 1.95E-02 | 19 | 4 |
| Hippo signaling pathway      | 3.11E-02 | 29 | 4 |
| Prolactin signaling pathway  | 3.17E-02 | 18 | 4 |
| Choline metabolism in cancer | 4.39E-02 | 25 | 4 |
| Adherens junction            | 4.46E-02 | 18 | 3 |
| MAPK signaling pathway       | 4.46E-02 | 51 | 4 |
| Cell cycle                   | 4.90E-02 | 27 | 4 |

**Supplementary Table 2. Ingenuity Pathway Analysis of “Diseases and Disorders” associated with miR-329-3p, miR-181a-3p, miR-199b-5p, miR-382-5p, miR-215-5p and miR-21-5p.**

| Name                                | <i>p</i> -value     | Molecules |
|-------------------------------------|---------------------|-----------|
| Cancer                              | 4.87E-02 - 3.31E-09 | 6         |
| Organismal Injury and Abnormalities | 4.87E-02 - 3.31E-09 | 6         |
| Reproductive System Disease         | 4.82E-02 - 3.31E-09 | 5         |
| Connective Tissue Disorders         | 4.06E-02 - 1.23E-04 | 2         |
| Inflammatory Response               | 4.06E-02 - 5.08E-04 | 4         |

**Supplementary Table 3. Ingenuity Pathway Analysis of “Molecular and Cellular Functions” associated with miR-329-3p, miR-181a-3p, miR-199b-5p, miR-382-5p, miR-215-5p and miR-21-5p.**

| Name                                   | <i>p</i> -value     | Molecules |
|----------------------------------------|---------------------|-----------|
| Cellular Development                   | 2.03E-02 - 3.67E-05 | 4         |
| Cellular Growth and Proliferation      | 2.03E-02 - 3.67E-05 | 4         |
| Cell Morphology                        | 4.17E-02 - 5.62E-04 | 2         |
| Cell-To-Cell Signaling and Interaction | 7.84E-03 - 5.62E-04 | 2         |
| Cellular Movement                      | 3.62E-02 - 8.42E-04 | 2         |

**Supplementary Table 4. Network analytics for miRNA-small molecule interactions for miR-329-3p, miR-181a-3p, miR-199b-5p, miR-382-5p, miR-215-5p and miR-21-5p.**

| miRNA         | Molecule                                    | Pubchem ID | Experiment                | Pubmed ID |
|---------------|---------------------------------------------|------------|---------------------------|-----------|
| hsa-mir-21-5p | 5-fluorouracil                              | 3385       | Microarray                | 21506117  |
| hsa-mir-21-5p | 5-aza-2'-deoxycytidine (5-Aza-CdR)          | 451668     | Microarray                | 22076154  |
| hsa-mir-21-5p | 17beta-estradiol (E2)                       | 5757       | Microarray                | 22403704  |
| hsa-mir-21-5p | 5-fluorouracil                              | 3385       | qRT-PCR                   | 17702597  |
| hsa-mir-21-5p | 17beta-estradiol (E2)                       | 5757       | Microarray                | 19528081  |
| hsa-mir-21-5p | 3,3'-diindolylmethane (BR-DIM)              | 3071       | qRT-PCR                   | 20724916  |
| hsa-mir-21-5p | 5-aza-2'-deoxycytidine (5-Aza-CdR)          | 451668     | Microarray                | 22076154  |
| hsa-mir-21-5p | 17beta-estradiol (E2)                       | 5757       | qRT-PCR                   | 22403704  |
| hsa-mir-21-5p | CDF (analogues of curcumin) + gemcitabine   | N/A        | qRT-PCR                   | 20388782  |
| hsa-mir-21-5p | Cisplatin                                   | 84093      | qRT-PCR                   | 22475935  |
| hsa-mir-21-5p | Curcumin                                    | 969516     | Microarray                | 18347134  |
| hsa-mir-21-5p | Curcumin                                    | 969516     | qRT-PCR                   | 22363450  |
| hsa-mir-21-5p | Diazobenzene and its derivatives            | N/A        | Luciferase reporter assay | 18712719  |
| hsa-mir-21-5p | 17beta-estradiol (E2)                       | 5757       | qRT-PCR                   | 19264808  |
| hsa-mir-21-5p | Curcumin                                    | 969516     | qRT-PCR                   | 20815812  |
| hsa-mir-21-5p | Bisphenol A                                 | 6623       | Microarray                | 20417706  |
| hsa-mir-21-5p | Bisphenol A                                 | 6623       | Microarray                | 20417706  |
| hsa-mir-21-5p | Bisphenol A                                 | 6623       | Microarray                | 22403704  |
| hsa-mir-21-5p | Caudatin                                    | 21633059   | qRT-PCR                   | 23708208  |
| hsa-mir-21-5p | CDF (analogues of curcumin)                 | N/A        | qRT-PCR                   | 20388782  |
| hsa-mir-21-5p | Gemcitabine                                 | 60750      | qRT-PCR                   | 24460329  |
| hsa-mir-21-5p | Gemcitabine                                 | 60750      | qRT-PCR                   | 21738581  |
| hsa-mir-21-5p | Ginsenoside Rh2                             | 119307     | Microarray                | 21372826  |
| hsa-mir-21-5p | Ginsenoside Rh2                             | 119307     | qRT-PCR                   | 21372826  |
| hsa-mir-21-5p | Ginsenoside Rh2                             | 119307     | Microarray                | 23152132  |
| hsa-mir-21-5p | Glossy ganoderma spore oil                  | N/A        | qRT-PCR                   | 21842656  |
| hsa-mir-21-5p | Dihydrotestosterone (DHT)                   | 10635      | Microarray                | 20945501  |
| hsa-mir-21-5p | 17beta-estradiol (E2)                       | 5757       | qRT-PCR                   | 19528081  |
| hsa-mir-21-5p | Hydroxamic acid HDACi LAQ824                | N/A        | Microarray                | 16452179  |
| hsa-mir-21-5p | Hydroxychloroquine                          | 3652       | Microarray                | 24121037  |
| hsa-mir-21-5p | Hydroxychloroquine                          | 3652       | qRT-PCR                   | 24121037  |
| hsa-mir-21-5p | Marine fungal metabolite 1386A              | N/A        | Microarray                | 22159329  |
| hsa-mir-21-5p | Gemcitabine                                 | 60750      | Northern blot             | 16762633  |
| hsa-mir-21-5p | Microcystin-LR (MC-LR)                      | 445434     | qRT-PCR                   | 22265967  |
| hsa-mir-21-5p | Nicotine                                    | 89594      | qRT-PCR                   | 24756761  |
| hsa-mir-21-5p | Nicotine                                    | 89594      | qRT-PCR                   | 21081469  |
| hsa-mir-21-5p | N-methyl-N-nitro-N'-nitrosoguanidine (MNNG) | 9576410    | qRT-PCR                   | 24821435  |
| hsa-mir-21-5p | 5-fluorouracil                              | 3385       | qRT-PCR                   | 21506117  |
| hsa-mir-21-5p | All-trans-retinoic acid (ATRA)              | 444795     | Microarray                | 21131358  |
| hsa-mir-21-5p | Glucocorticoid                              | N/A        | qRT-PCR                   | 22815788  |
| hsa-mir-21-5p | Glucocorticoid                              | N/A        | TaqMan low-density array  | 22815788  |

|               |                                              |         |               |          |
|---------------|----------------------------------------------|---------|---------------|----------|
| hsa-mir-21-5p | Arsenite                                     | 544     | qRT-PCR       | 24004609 |
| hsa-mir-21-5p | Sulindac sulfide                             | 5352624 | qRT-PCR       | 22286762 |
| hsa-mir-21-5p | Sunitinib                                    | 5329102 | qRT-PCR       | 25061297 |
| hsa-mir-21-5p | Temozolomide                                 | 5394    | qRT-PCR       | 22753745 |
| hsa-mir-21-5p | Matrine                                      | 91466   | qRT-PCR       | 22832383 |
| hsa-mir-21-5p | Trastuzumab                                  | N/A     | qRT-PCR       | 22384020 |
| hsa-mir-21-5p | Trastuzumab                                  | N/A     | Microarray    | 22384020 |
| hsa-mir-21-5p | Trichostatin A (TSA)                         | 444732  | Microarray    | 19112422 |
| hsa-mir-21-5p | Trichostatin A (TSA)                         | 444732  | Northern blot | 19112422 |
| hsa-mir-21-5p | Trimetazidine (TMZ)                          | 21109   | qRT-PCR       | 22842854 |
| hsa-mir-21-5p | Triptolide                                   | 107985  | qRT-PCR       | 22957792 |
| hsa-mir-21-5p | Trypaflavine                                 | N/A     | qRT-PCR       | 20529860 |
| hsa-mir-21-5p | Valproate                                    | 3121    | qRT-PCR       | 20427269 |
| hsa-mir-21-5p | Dihydrotestosterone (DHT)                    | 10635   | qRT-PCR       | 20945501 |
| hsa-mir-21-5p | Doxorubicin                                  | 31703   | Microarray    | 19237188 |
| hsa-mir-21-5p | Enoxacin                                     | 3229    | qRT-PCR       | 21368194 |
| hsa-mir-21-5p | Etoposide                                    | 36462   | Microarray    | 19633716 |
| hsa-mir-21-5p | Trastuzumab                                  | N/A     | Microarray    | 22384020 |
| hsa-mir-21-5p | Formaldehyde                                 | 712     | Microarray    | 21147603 |
| hsa-mir-21-5p | Progesterone                                 | 5994    | Microarray    | 22543862 |
| hsa-mir-21-5p | CDF (analogues of curcumin)<br>+ gemcitabine | N/A     | qRT-PCR       | 21408027 |
| hsa-mir-21-5p | All-trans-retinoic acid<br>(ATRA)            | 444795  | qRT-PCR       | 21131358 |
| hsa-mir-21-5p | Arsenic trioxide                             | 14888   | qRT-PCR       | 22072212 |
| hsa-mir-21-5p | O,p'-dichlorodiphenyltrichloroethane (DDT)   | 13089   | Microarray    | 22403704 |
| hsa-mir-21-5p | Prednisone                                   | 5865    | qRT-PCR       | 24121037 |
| hsa-mir-21-5p | Morphine                                     | 5288826 | Microarray    | 20564181 |

|                 |                             |         |                          |          |
|-----------------|-----------------------------|---------|--------------------------|----------|
| hsa-mir-21-5p   | CDF (analogues of curcumin) | N/A     | qRT-PCR                  | 21408027 |
| hsa-mir-21-5p   | Prednisone                  | 5865    | Microarray               | 24121037 |
| hsa-mir-21-5p   | Polylysine                  | 162282  | qRT-PCR                  | 20529860 |
| hsa-mir-199b-5p | Imatinib mesylate           | 123596  | qRT-PCR                  | 20460641 |
| hsa-mir-199b-5p | Imatinib mesylate           | 123596  | TaqMan low-density array | 20460641 |
| hsa-mir-199b-5p | Glucose                     | 5793    | qRT-PCR                  | 24394957 |
| hsa-mir-199b-5p | 4-hydroxynonenal            | 5283344 | Microarray               | 19022373 |
| hsa-mir-199b-5p | Enoxacin                    | 3229    | qRT-PCR                  | 18641635 |
| hsa-mir-181a-3p | Gemcitabine                 | 60750   | Microarray               | 19237188 |
| hsa-mir-181a-3p | Curcumin                    | 969516  | qRT-PCR                  | 22510010 |
| hsa-mir-181a-3p | Doxorubicin                 | 31703   | Microarray               | 19237188 |
| hsa-mir-181a-3p | Gemcitabine                 | 60750   | Northern blot            | 16762633 |
| hsa-mir-181a-3p | 4-hydroxynonenal            | 5283344 | Microarray               | 19022373 |
| hsa-mir-181a-3p | Diethylstilbestrol          | 448537  | Microarray               | 19549897 |
| hsa-mir-215-5p  | Trichostatin A (TSA)        | 444732  | Microarray               | 21971930 |
| hsa-mir-215-5p  | Formaldehyde                | 712     | Microarray               | 21147603 |
| hsa-mir-215-5p  | Arsenic trioxide            | 14888   | qRT-PCR                  | 22072212 |
| hsa-mir-382-5p  | Morphine                    | 5288826 | qRT-PCR                  | 21224041 |
| hsa-mir-382-5p  | Vorinostat (SAHA)           | 5311    | Microarray               | 19513533 |
| hsa-mir-329-3p  | Glucose                     | 5793    | Microarray               | 24394957 |
| hsa-mir-329-3p  | Gemcitabine                 | 60750   | Northern blot            | 16762633 |

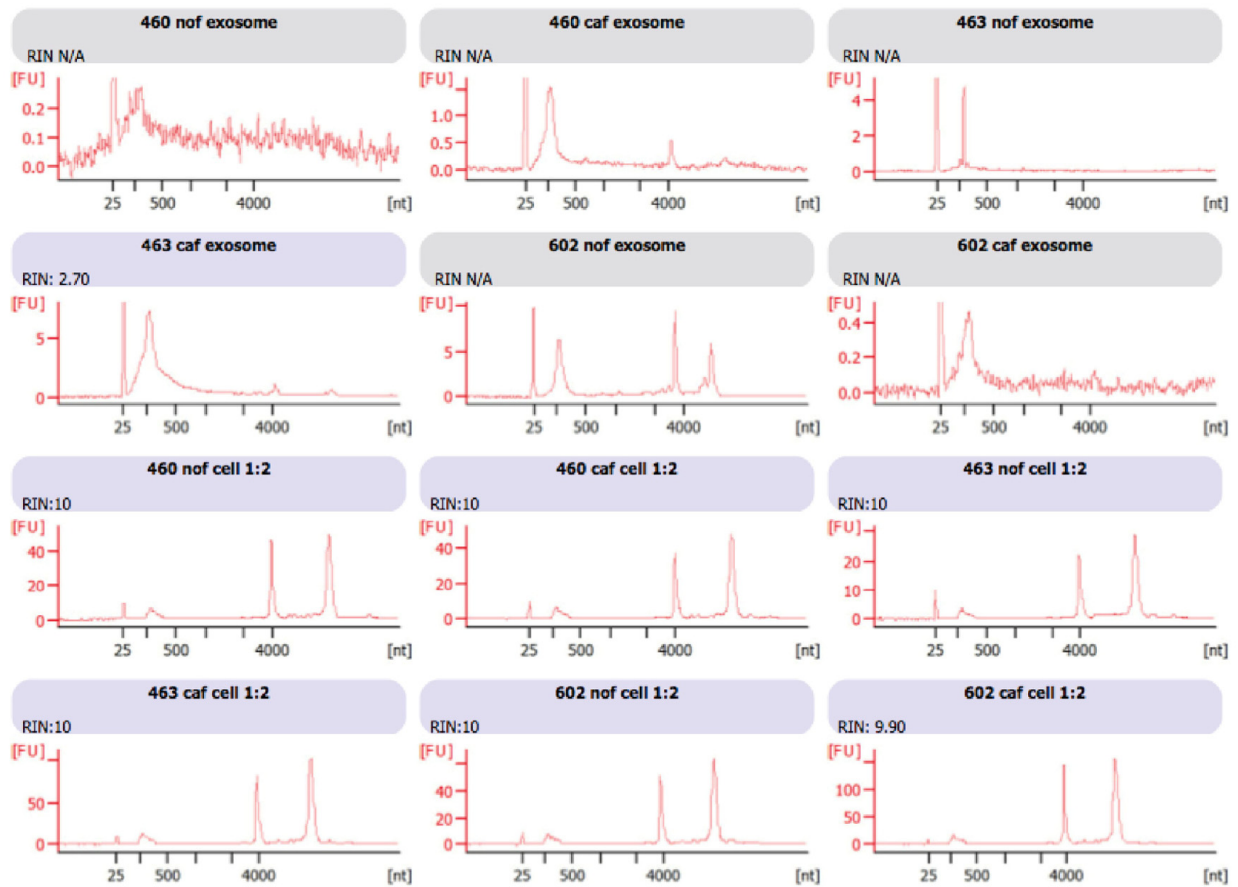

**Supplementary Figure 1. Assessment of RNA by Bioanalyzer reveals distinct cellular and exosomal profile.** Exosomal RNA lacks the 18s and 28s ribosomal RNA peaks which are seen clearly in total cellular RNA. Therefore, RIN (RNA Integrity Number) is not applicable to exosomal RNA. RIN of all cellular RNA samples was greater or equal to 9.90. Cellular RNA samples were diluted 1:2. The peak at 25 nt represents the marker.

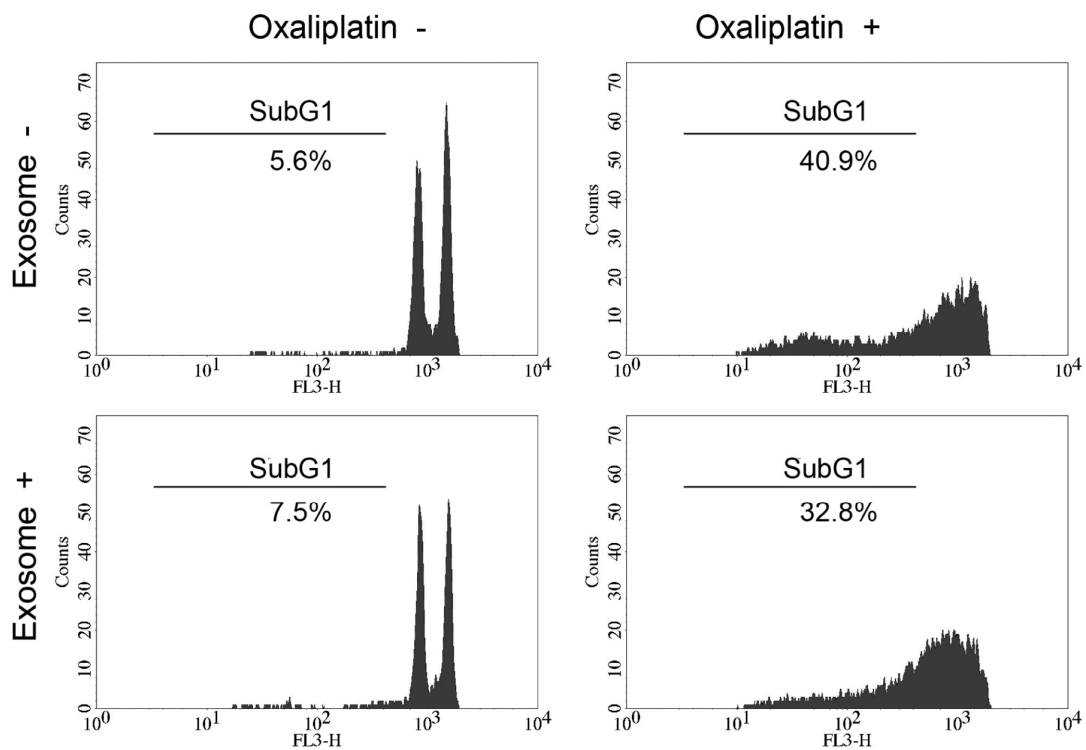

**Supplementary Figure 2. SubG1 analysis by flow cytometry demonstrates protective effect of fibroblast exosomes in the presence of oxaliplatin.** *Top left:* control DLD1 cells; *top right:* DLD1 cells treated with 200  $\mu$ M oxaliplatin for 24 h; *bottom left:* DLD1 cells co-cultured with 15  $\mu$ g/ml MRC5 fibroblast exosomes for 24 h; *bottom right:* DLD1 cells co-cultured with 15  $\mu$ g/ml MRC5 exosomes for 24 h, then treated with 200 $\mu$ M oxaliplatin for 24 h. Cells registered prior to the G1 peak (subG1) are considered apoptotic.

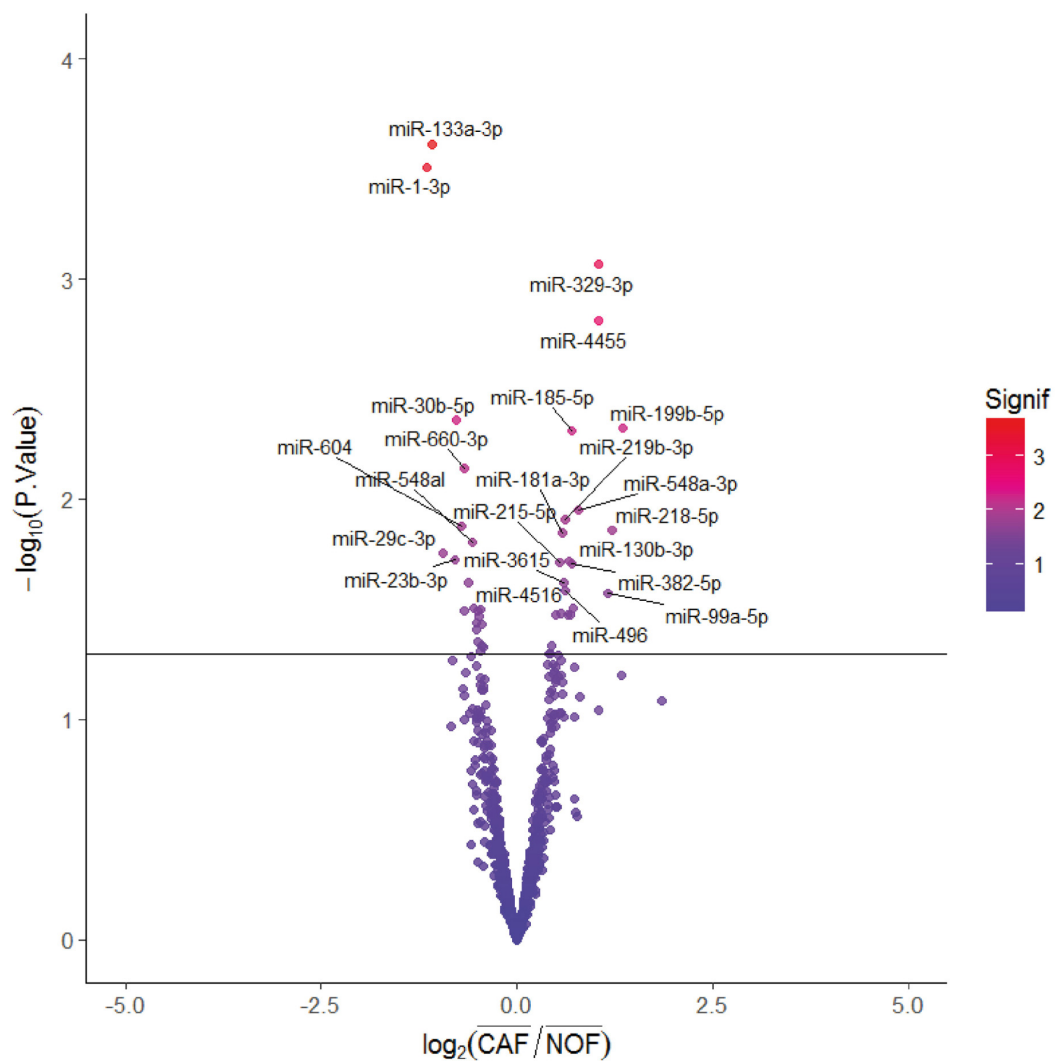

**Supplementary Figure 3. CAF and NOF exosomes contain distinct miRNA cargos.** Volcano plot displaying miRNAs which are more or less abundant in CAF compared to NOF exosomes (x-axis) against statistical significance (y-axis). This is an alternative representation of data displayed in the previous heat map (Fig. 5). Threshold of statistical significance set at 0.05.



| miRNA        | 460    |        | 463    |        | 602    |        |
|--------------|--------|--------|--------|--------|--------|--------|
|              | NOF Ex | CAF Ex | NOF Ex | CAF Ex | NOF Ex | CAF Ex |
| miR-21-5p    | 12132  | 16327  | 8216   | 16316  | 5404   | 6330   |
| miR-135b-5p  | 46     | 72     | 31     | 78     | 71     | 1635   |
| miR-20a/b-5p | 146    | 306    | 89     | 284    | 158    | 210    |
| miR-19b-3p   | 135    | 311    | 115    | 218    | 135    | 232    |
| miR-19a-3p   | 81     | 196    | 85     | 184    | 146    | 141    |
| miR-155-5p   | 109    | 110    | 55     | 138    | 92     | 110    |
| miR-181a-3p  | 53     | 107    | 53     | 171    | 71     | 81     |
| miR-130b-3p  | 40     | 61     | 32     | 145    | 67     | 75     |
| miR-95-3p    | 43     | 45     | 27     | 62     | 31     | 32     |
| miR-499a-5p  | 26     | 44     | 38     | 53     | 50     | 17     |

**Supplementary Figure 4. MiR-21 is abundant and differentially expressed in exosomes from primary colorectal fibroblasts.** Heat map of normalized NanoString counts for NOF and CAF exosome samples for ten experimentally validated CRC oncomirs. MiR-21 counts are greater than 5000 for all samples, and consistently higher in CAF exosomes than NOF exosomes.

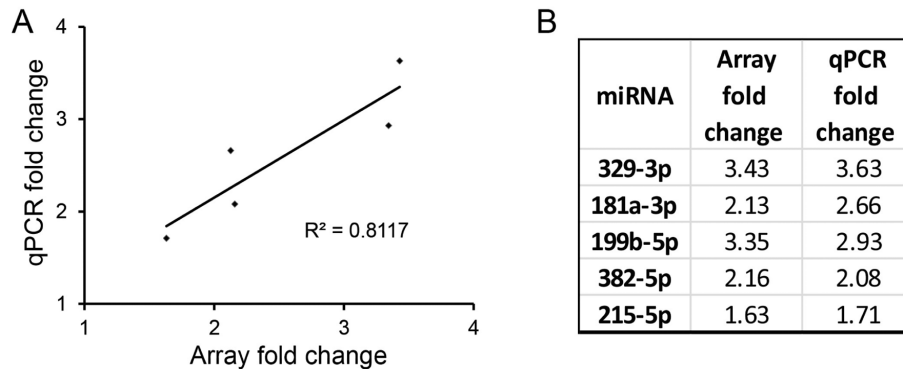

**Supplementary Figure 5. Nanostring miRNA fold changes correlate with qPCR fold changes.** (A) Scatter plot of miRNA fold changes between NOF and CAF exosomes determined by NanoString (x-axis) and validated by qPCR (y-axis). Pearson product moment correlation coefficient,  $R^2 = 0.81$ ;  $p=0.02$ . (B) Numerical values of MiRNA fold changes between NOF and CAF exosomes by Nanostring and qPCR.

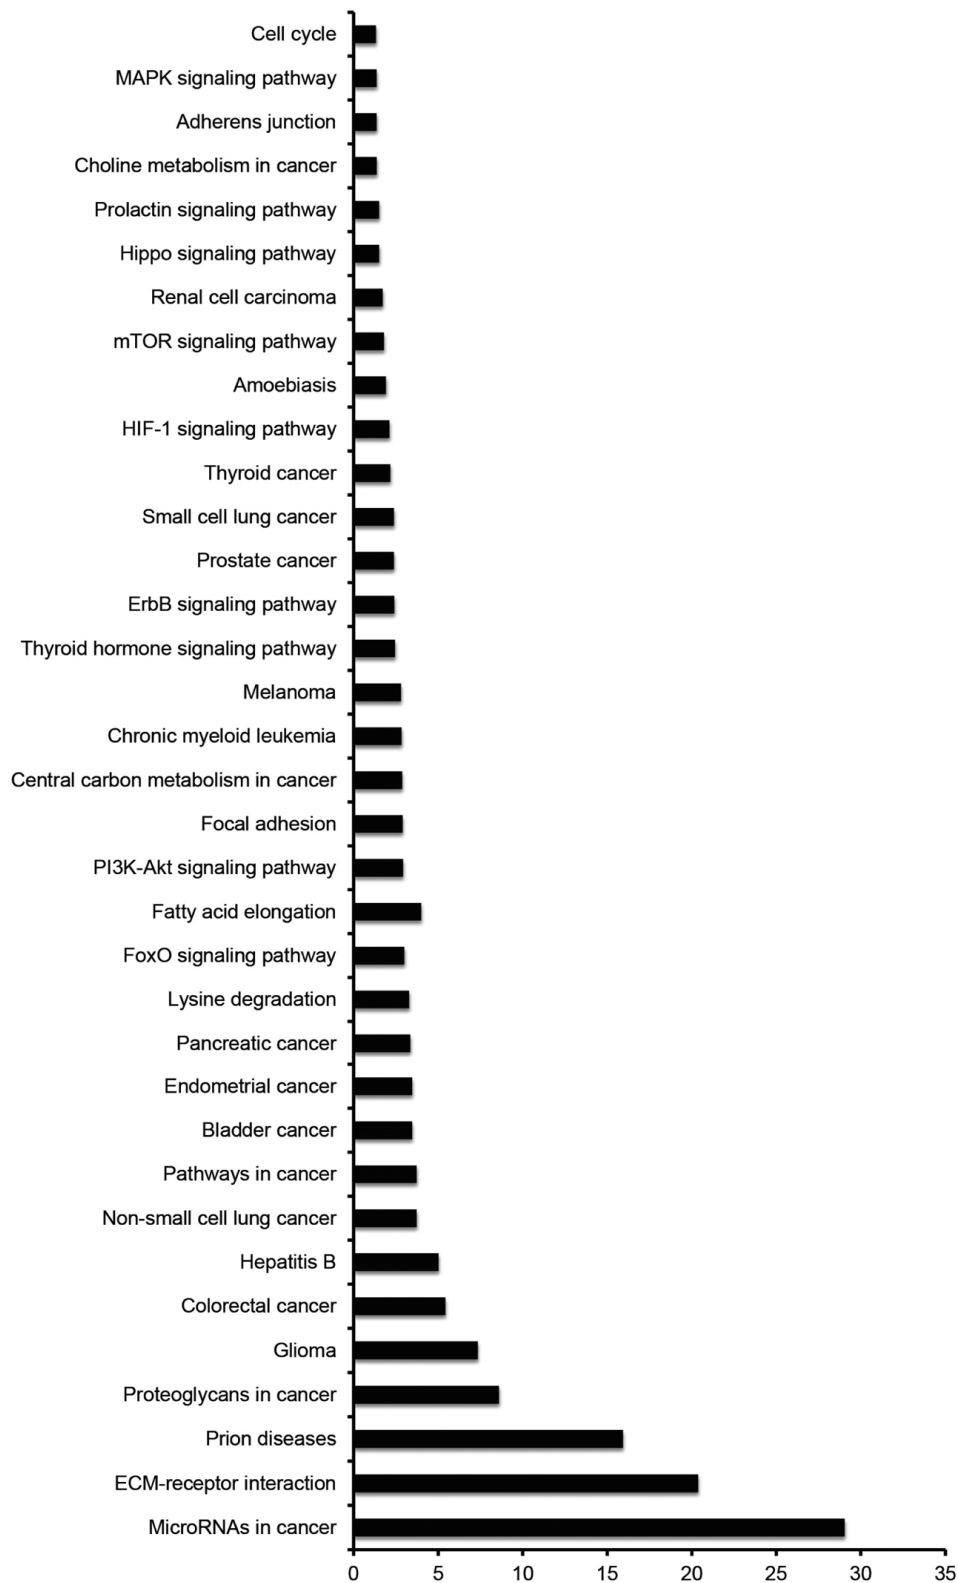

**Supplementary Figure 6. CAF-derived exosomal miRNAs converge on multiple cancer-relevant pathways.** Statistical significance of 36 KEGG pathways co-regulated by miR-329-3p, miR-181a-3p, miR-199b-5p, miR-382-5p, miR-215-5p and miR-21-5p. Data represented as  $-\log_{10}(p \text{ value})$ . Fisher-exact meta-analysis method with FDR-adjusted  $p$ -values.
